# Supplementary material
Source: publisher site journal article supplement (https://www.dovepress.com/article/376063)
Supplement: Supplementary file 1 [file get_supplementary_file.php]

**Supplementary information for:**

**Circular RNA circRASSF5 functions as an anti-oncogenic factor in hepatocellular carcinoma by acting as a competitive endogenous RNA through sponging miR-331-3p**

Zhao Zhou1, 2 +, Xiaohan Cui1, 2 +, Peng Gao2, Xudong Zhang2, Chunfu Zhu2, *, Beicheng Sun1, *

1Department of Hepatobiliary Surgery of Nanjing Drum Tower Hospital, Clinical College of Nanjing Medical University, Nanjin, P.R. China.

2The Affiliated Changzhou NO.2 People’s Hospital of Nanjing Medical University, Changzhou, P.R. China.

+These authors contributed equally to this work.

*Correspondence: Chun fu Zhu, The Affiliated Changzhou NO.2 People’s Hospital of Nanjing Medical University, Changzhou, P.R. China. E-mail: [zcfmlm@njmu.edu.cn](mailto:zcfmlm@njmu.edu.cn). Beicheng Sun, Department of Hepatobiliary Surgery of Nanjing Drum Tower Hospital, Clinical College of Nanjing Medical University, Nanjing, P.R. China. E-mail: [sunbc@nju.edu.cn](mailto:sunbc@nju.edu.cn).

**Contents:**

1. **Supplementary Figures**
2. **Supplementary Tables**
3. **Supplementary Figures:**

**
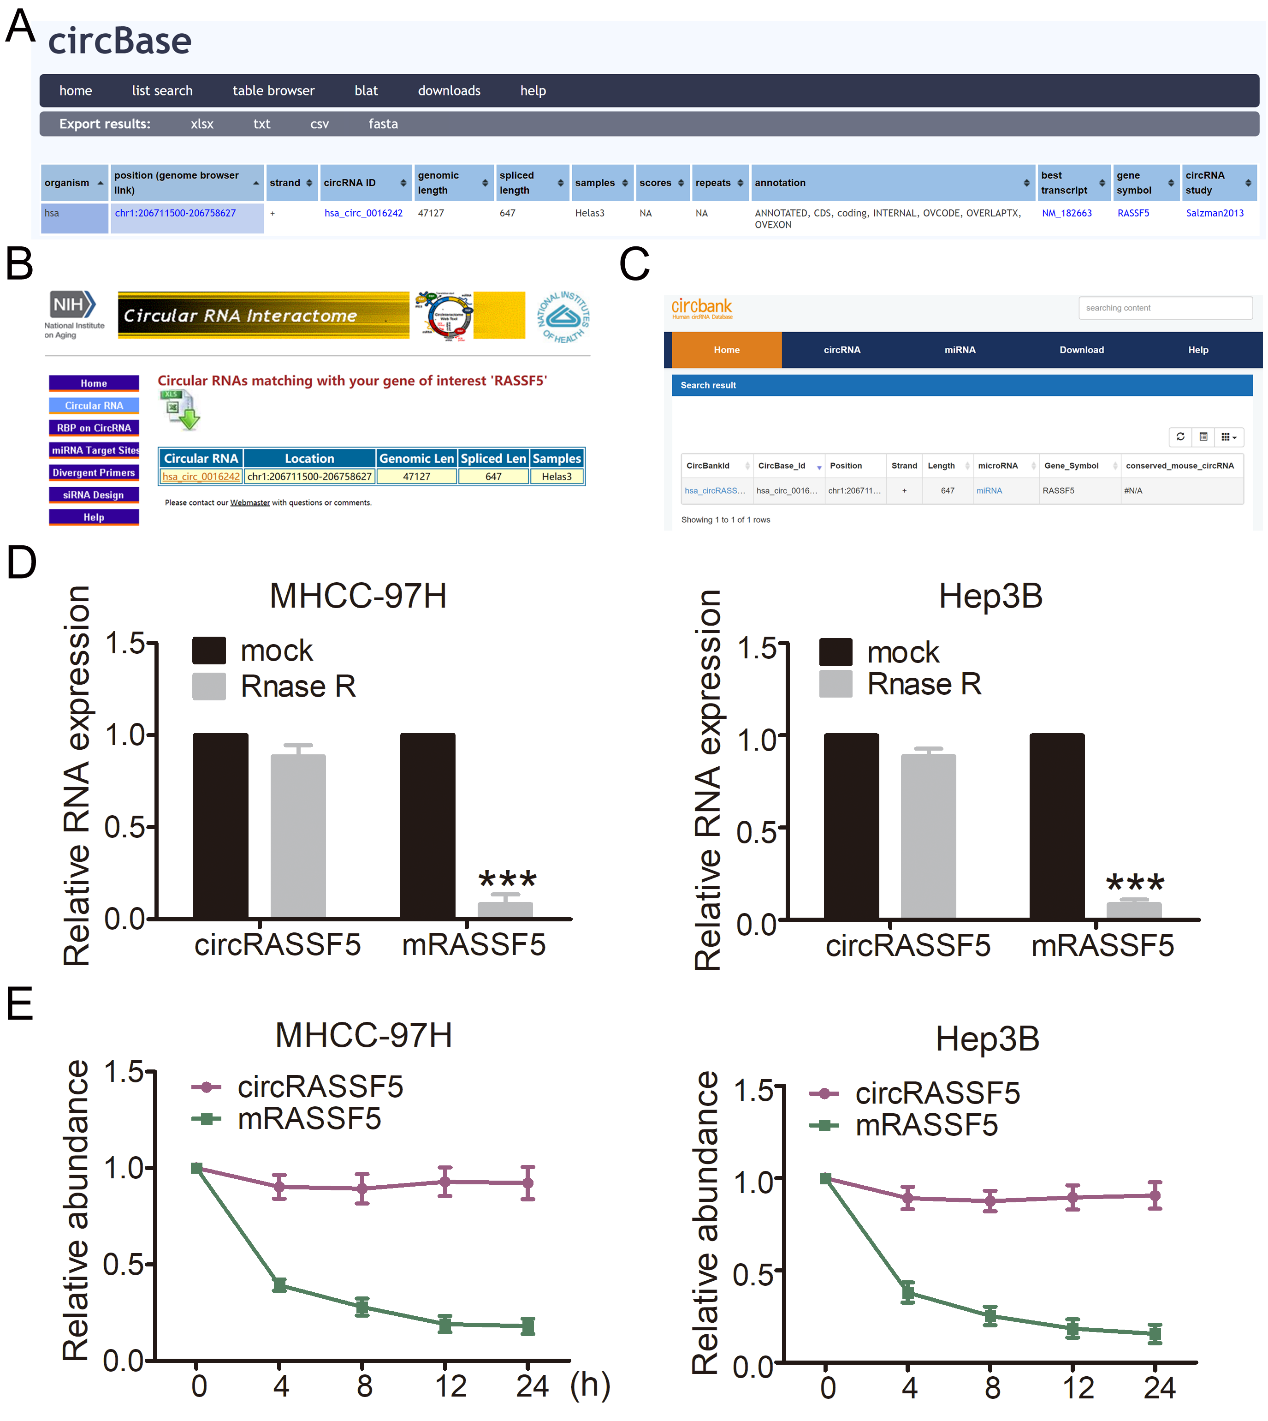
**

**Figure S1.** Identification of circRASSF5.(A, B, C) Bioinformatics retrieval in the circBase (<http://www.circbase.org>), Circular RNA Interactome (<https://circinteractome.nia.nih.gov/>) and circbank (<http://www.circbank.cn>). (D) QRT-PCR for the abundance of circRASSF5 in HCC cells treated with RNase R. (E) The abundance of circRASSF5 and RASSF5 mRNA was, respectively, assessed by qRT-PCR in Hep3B and MHCC-97H cells treated with Actinomycin D at the indicated time points. ****P* < 0.001.

**
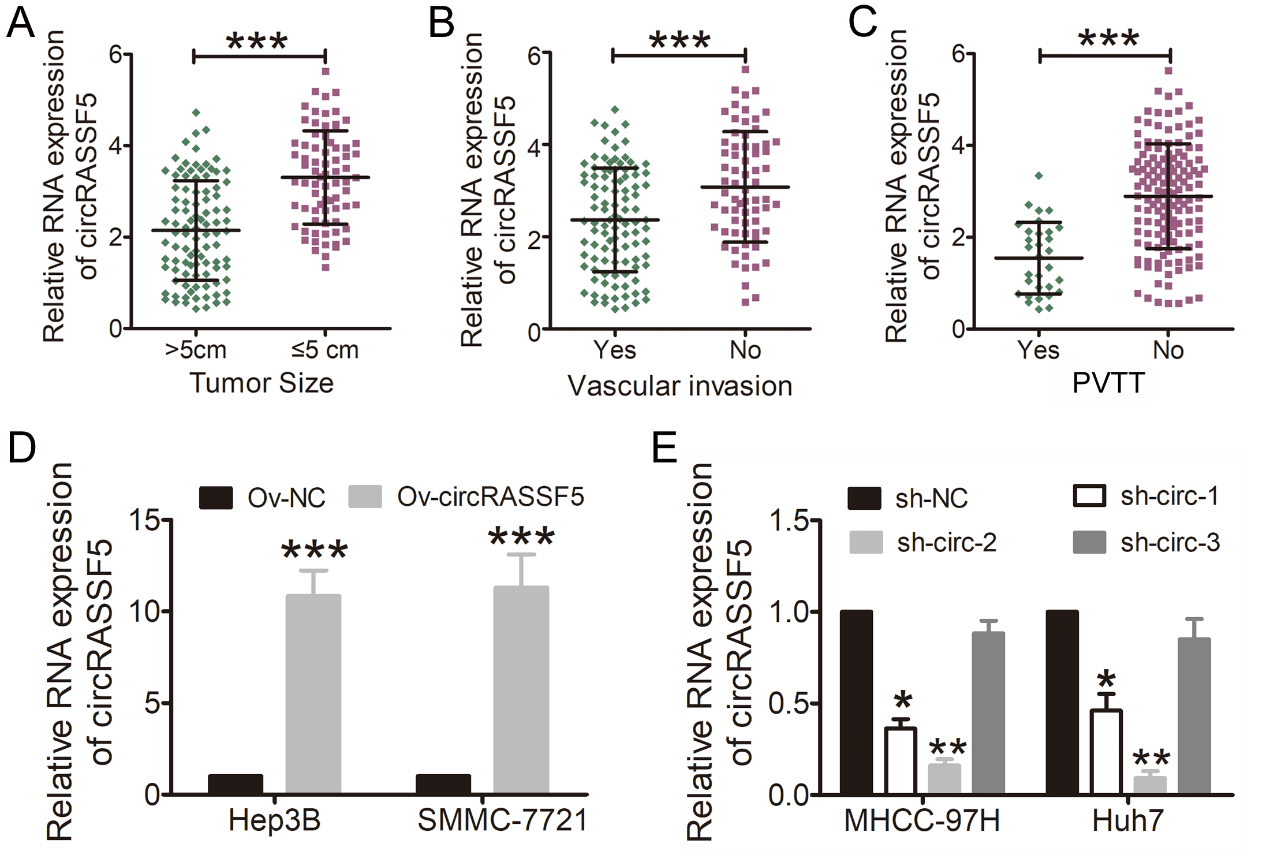
**

**Figure S2.** Detection of the expression of circRASSF5 in HCC tissues and cells. (A) The level of circRASSF5 was significant lower in HCC tissues with tumor size > 5cm than with tumor size ≤ 5cm. (B) The level of circRASSF5 was significantly downregulated in HCC tissues with vascular invasion than that without vascular invasion. (C) The level of circRASSF5 was significantly downregulated in HCC tissues with PVTT (portal vein tumor thrombus) than that without PVTT. (D) The relative expression of circRASSF5 in Hep3B and SMMC-7721 cells was detected by qRT-PCR when circRASSF5 was overexpressed. (E) The knockdown efficiency of circRASSF5 in MHCC-97H and Huh7 cells was measured by qRT-PCR. Each experiment was performed in triplicate and the results are shown as the means ± SD. **P* < 0.05; ***P* < 0.01; ****P* < 0.001.

**
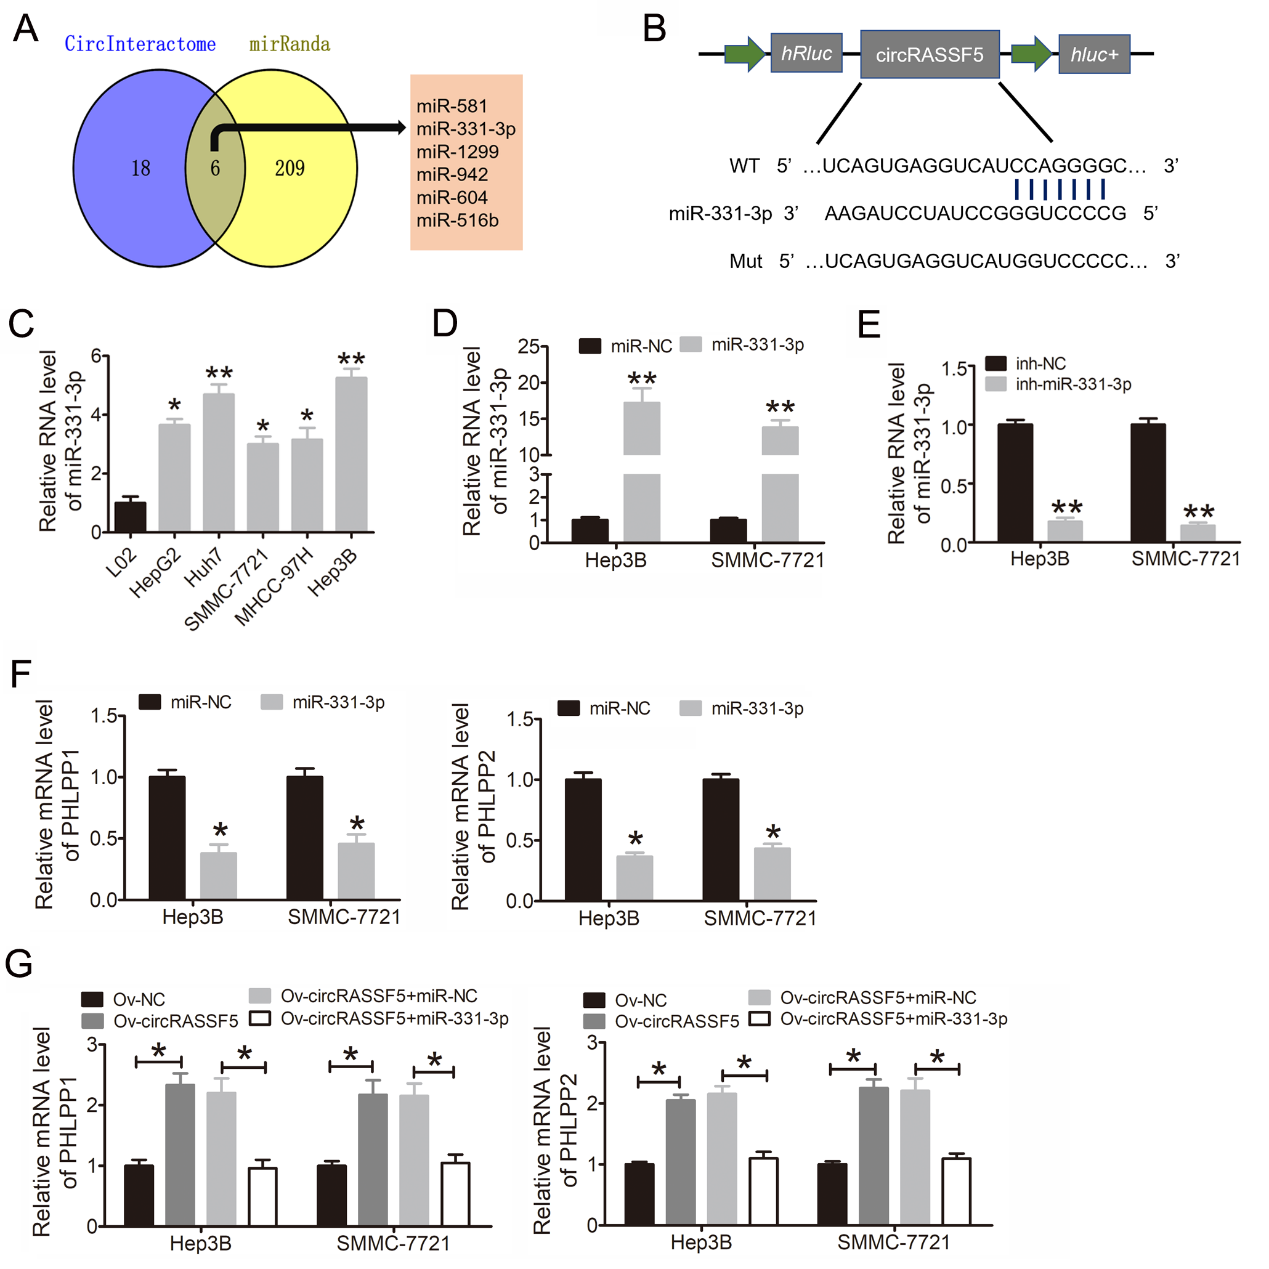
**

**Figure S3.** Detection of the transfection efficiency.(A) 6 possible binding miRNAs of circRASSF5 forecasted and calculated by CircInteractome and miRanda were showed. (B) Schematic representation of circRASSF5 wild-type (WT) and mutant (Mut) luciferase reporter vectors. (C) The expression level of miR-331-3p in HCC cell lines and human normal liver cell line was investigated by qRT-PCR. (D) The overexpression efficiency of miR-331-3p in Hep3B and SMMC-7721 cells was detected by qRT-PCR compared with the control group. (E) The knockdown efficiency of miR-331-3p in Hep3B and SMMC-7721 cells was detected by qRT-PCR compared with the control group. (F) The mRNA expression of PHLPP1 and PHLPP2 was measured by qRT-PCR after miR-331-3p was overexpressed. (G) The mRNA expression of PHLPP1 and PHLPP2 was measured by qRT-PCR in cells co-transfected with Ov-circRASSF5 and miR-331-3p mimics. **P*<0.05; ***P* < 0.01.


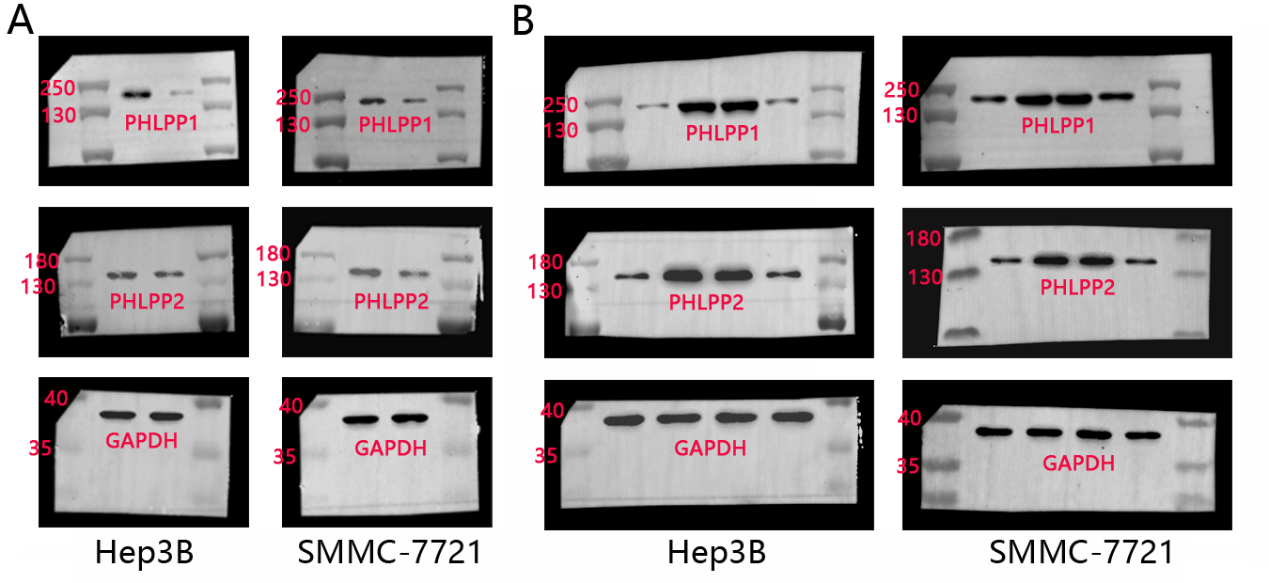


**Figure S4.** The whole western blot images showing all bands and molecular weight markers.(A) The whole western blot images presented in Figure 4C. (B) The whole western blot images presented in Figure 5B.

1. **Supplementary Tables:**

**Supplementary Table S1.** Primers for Quantitative RT- PCR.

| Gene name | Primer | Sequence |
| --- | --- | --- |
|
| CircRASSF5 | Forward Primer | AGGAGAATGAAACTGGAGAGGT |
| Reverse Primer | GGATAAACCCTCCTGCTGACT |
| RASSSF5 | Forward Primer | GGGCATGAAACTGAGTGAAGA |
| Reverse Primer | TGGCATCATAGATGGACTGGG |
| PHLPP1 | Forward Primer | CCTCATCCGCTTCTATGCAGG |
| Reverse Primer | GCATCTTGCCTTTACGGACAT |
| PHLPP2 | Forward Primer | ATGGAGCAGACACTACCACTG |
| Reverse Primer | GCAAAGGACGAGATGTAAGTCA |
| GAPDH | Forward Primer | GGAGCGAGATCCCTCCAAAAT |
| Reverse Primer | GGCTGTTGTCATACTTCTCATGG |
| miR-331-3p | Forward Primer | GAGCTGAAAGCACTCCCAA |
| Reverse Primer | CACACTCTTGATGTTCCAGGA |
| miR-1299 | Forward Primer | CCCTAACGGTTCTGGAATTCTGT |
| Reverse Primer | TATGGTTGTTCACGACTCCTTCAC |
| miR-516b | Forward Primer | ACCATCTGGAGGTAAGAAGCAC |
| Reverse Primer | GAGTAACCCTCTGAAAGGAAGCA |
| miR-581 | Forward Primer | GATCTCTTGTGTTCT |
| Reverse Primer | ATACCTCGGACCCTGCACTG |
| miR-604 | Forward Primer | AGGCTGCGGAATTCAGGAC |
| Reverse Primer | CAGTGCGTGTCGTGGAGT |
| miR-942 | Forward Primer | GCATGGATCCCTTTAACAATGGTTCCTCCG |
| Reverse Primer | GCCGGTCTAGAAGCACCTTTTGTTTCTATTATCACG |
| U6 | Forward Primer | CTCGCTTCGGCAGCACA |
| Reverse Primer | AACGCTTCACGAATTTGCGT |

**Supplementary Table S2.** The mimic and control sequences of miR-331-3p.

| mimic | Sense | UGAAACAUACACGGGAAACCUC |
| --- | --- | --- |
|  | antisense | GGUUUCCCGUGUAUGUUUCAUU |
| control | sense | UUCUCCGAACGUGUCACGUTT |
|  | antisense | ACGUGACACGUUCGGAGAATT |

**Supplementary Table S3.** The probes used in this study are listed as follows.

|  | Sequence (5’-3’) |
| --- | --- |
|
| FISH Probes | |
| Cy5-circRASSF5 | AGGTGAATTTACAGTCTCTACCTCTCCAG |
| Cy3-miR-331-3p | TTCTAGGATAGGCCCAGGGGC |
| Biotin-coupled probes | |
| Biotin-NC | AUGCCAUCAAGGAGGUGAACCUGGCGGCUA |
| Biotin-circRASSF5 | ACUGGAGAGGUAGAGACUGUAAAUUCACCU |
| Biotin-miR-331-3p WT | GCCCCUGGGCCUAUCCUAGAA |
| Biotin-miR-331-3p Mut | GGGGGACCGCCUAUCCUAGAA |

**Supplementary Table S4.** Univariate analyses for overall survival (OS) and recurrence-free survival (RFS) in 172 HCC patients. *P*-value in bold indicates statistically significant.

| Variables | OS | | | RFS | | |
| --- | --- | --- | --- | --- | --- | --- |
| HR | 95% CI | *P* value | HR | 95% CI | *P* value |
| Gender | 0.679 | 0.393-1.173 | 0.165 | 0.743 | 0.443-1.246 | 0.260 |
| Female vs Male |
| Age | 0.986 | 0.671-1.449 | 0.943 | 1.047 | 0.719-1.523 | 0.812 |
| >60 vs ≤60 |
| HBsAg | 1.308 | 0.818-2.091 | 0.262 | 1.359 | 0.859-2.150 | 0.190 |
| Positive vs Negative |
| Liver cirrhosis | 1.320 | 0.876-1.990 | 0.185 | 1.389 | 0.928-2.079 | 0.110 |
| Yes, vs No |
| Serum AFP (ng/mL) | 1.498 | 0.945-2.346 | 0.086 | 1.430 | 0.922-2.219 | 0.110 |
| >20 vs ≤20 |
| Tumor number | 1.929 | 1.172-3.175 | **0.010** | 1.776 | 1.082-2.916 | **0.023** |
| Multiple vs Single |
| Tumor size | 1.531 | 1.037-2.260 | **0.032** | 1.673 | 1.139-2.456 | **0.009** |
| ≥5cm vs <5cm |
| Vascular invasion | 1.641 | 1.108-2.430 | **0.014** | 1.500 | 1.008-2.230 | **0.045** |
| Yes, vs No |
| Portal vein tumor thrombus | 1.855 | 1.181-2.912 | **0.007** | 1.800 | 1.150-2.817 | **0.010** |
| Yes, vs No |
| Edmondson-Steiner grade | 1.376 | 0.893-2.121 | 0.148 | 1.307 | 0.851-2.006 | 0.221 |
| III/IV vs I/II |
| circRASSF5 expression | 0.623 | 0.425-0.912 | **0.015** | 0.591 | 0.406-0.859 | **0.006** |
| High vs low |
